# Supplementary material for: Short chain fatty acids produced by colonizing intestinal commensal bacterial interaction with expressed breast milk are anti-inflammatory in human immature enterocytes
Source: PubMed Central journal article supplement (PMC7034856; doi:10.1371/journal.pone.0229283), 2020-02-21
Supplement: pone.0229283.s004.pdf [file pone.0229283.s004.pdf]

**Fig 1. The effects of different doses of short-chain fatty acids (SCFAs) on prevention of IL-1 $\beta$ -induced IL-8 induction in H4 cells.**

| A                  | Con           | IL-1 $\beta$    | Ace 5mM-IL-1 $\beta$  | Ace 10mM-IL-1 $\beta$  | Ace 20mM-IL-1 $\beta$  | Ace 30mM-IL-1 $\beta$  |
|--------------------|---------------|-----------------|-----------------------|------------------------|------------------------|------------------------|
| IL8(pg/mg protein) | 52.825        | 1453.376        | 965.813               | 791.379                | 258.939                | 76.022                 |
|                    | 55.575        | 1211.505        | 944.436               | 817.771                | 271.825                | 81.368                 |
|                    | 60.497        | 1475.066        | 950.636               | 795.051                | 308.373                | 95.882                 |
| <b>Average</b>     | <b>56.299</b> | <b>1379.982</b> | <b>953.628</b>        | <b>801.400</b>         | <b>279.712</b>         | <b>84.424</b>          |
| SD                 | 3.887         | 146.308         | 10.998                | 14.296                 | 25.644                 | 10.277                 |
|                    |               |                 |                       |                        |                        |                        |
| B                  | Con           | IL-1 $\beta$    | Pro 5mM-IL-1 $\beta$  | Pro 10mM-IL-1 $\beta$  | Pro 20mM-IL-1 $\beta$  | Pro 30mM-IL-1 $\beta$  |
| IL8(pg/mg protein) | 52.825        | 1453.376        | 705.500               | 748.230                | 496.256                | 382.263                |
|                    | 55.575        | 1211.505        | 638.961               | 674.413                | 535.368                | 441.531                |
|                    | 60.497        | 1475.066        | 820.252               | 599.458                | 458.374                | 449.388                |
| <b>Average</b>     | <b>56.299</b> | <b>1379.982</b> | <b>721.571</b>        | <b>674.034</b>         | <b>496.666</b>         | <b>424.394</b>         |
| SD                 | 3.887         | 146.308         | 91.708                | 74.387                 | 38.498                 | 36.697                 |
|                    |               |                 |                       |                        |                        |                        |
| C                  | Con           | IL-1 $\beta$    | Buty 5mM-IL-1 $\beta$ | Buty 10mM-IL-1 $\beta$ | Buty 20mM-IL-1 $\beta$ | Buty 30mM-IL-1 $\beta$ |
| IL8(pg/mg protein) | 52.825        | 1453.376        | 1075.495              | 621.582                | 729.811                | 742.070                |
|                    | 55.575        | 1211.505        | 1213.957              | 442.900                | 666.235                | 682.192                |
|                    | 60.497        | 1475.066        | 1393.093              | 991.664                | 642.199                | 658.468                |
| <b>Average</b>     | <b>56.299</b> | <b>1379.982</b> | <b>1227.515</b>       | <b>685.382</b>         | <b>679.415</b>         | <b>694.243</b>         |
| SD                 | 3.887         | 146.308         | 159.232               | 279.890                | 45.268                 | 43.084                 |

**Fig 2. SCFA inhibited IL-1 $\beta$  induced IL-8 secretion in H4 organoids and fetal human intestinal organoids.**

| A                  | Con             | IL-1 $\beta$    | Ace-IL-1 $\beta$ | Pro-IL-1 $\beta$ | Buty-IL-1 $\beta$ |
|--------------------|-----------------|-----------------|------------------|------------------|-------------------|
| IL8(pg/mg protein) | 3877.257        | 9801.792        | 5787.86          | 3931.875         | 5470.684          |
|                    | 3791.802        | 9906.25         | 5534.542         | 4660.213         | 5457.261          |
|                    | 3209.186        | 7542.541        | 4679.091         | 5392.119         | 5049.431          |
| <b>Average</b>     | <b>3626.082</b> | <b>9083.528</b> | <b>5333.831</b>  | <b>4661.402</b>  | <b>5325.792</b>   |
| SD                 | 363.562         | 1335.555        | 580.996          | 730.123          | 239.430           |
|                    |                 |                 |                  |                  |                   |
| B                  | Con             | IL-1 $\beta$    | Ace-IL-1 $\beta$ | Pro-IL-1 $\beta$ | Buty-IL-1 $\beta$ |
| IL8(pg/mg protein) | 348.719         | 451.427         | 396.819          | 275.035          | 296.982           |
|                    | 348.557         | 486.971         | 427.190          | 263.215          | 325.936           |
|                    | 376.641         | 578.029         | 385.319          | 244.607          | 269.337           |
| <b>Average</b>     | <b>357.972</b>  | <b>505.476</b>  | <b>403.110</b>   | <b>260.952</b>   | <b>297.418</b>    |
| SD                 | 16.167          | 65.298          | 21.632           | 15.340           | 28.302            |
|                    |                 |                 |                  |                  |                   |
| C                  | Con             | IL-1 $\beta$    | Ace-IL-1 $\beta$ | Pro-IL-1 $\beta$ | Buty-IL-1 $\beta$ |
| IL8(pg/mg protein) | 928.992         | 2479.371        | 1094.093         | 1180.704         | 1490.306          |
|                    | 1050.068        | 1916.334        | 1106.584         | 1052.224         | 1447.706          |
|                    | 1031.451        | 1966.013        | 1094.093         | 948.612          | 1246.876          |
| <b>Average</b>     | <b>1003.504</b> | <b>2120.573</b> | <b>1098.257</b>  | <b>1060.513</b>  | <b>1394.963</b>   |
| SD                 | 65.197          | 311.720         | 7.212            | 116.268          | 130.004           |

**Fig 3. The anti-inflammatory effects of SCFAs on immature enterocytes in ex vivo.**

| <b>A</b>               | <b>Con</b>    | <b>IL-1<math>\beta</math></b> | <b>Ace-IL-1<math>\beta</math></b> | <b>Pro-IL-1<math>\beta</math></b> | <b>Buty-IL-1<math>\beta</math></b> |
|------------------------|---------------|-------------------------------|-----------------------------------|-----------------------------------|------------------------------------|
| <b>MIP2</b>            | 28.932        | 388.940                       | 37.909                            | 62.260                            | 33.761                             |
| <b>(pg/mg protein)</b> | 22.033        | 322.404                       | 49.815                            | 43.465                            | 53.640                             |
|                        | 51.375        | 354.497                       | 77.106                            | 63.148                            | 83.612                             |
|                        | 63.766        | 357.779                       | 96.218                            | 63.468                            | 82.878                             |
|                        | 98.350        | 260.631                       | 70.979                            | 82.729                            | 75.646                             |
|                        | 113.639       | 361.347                       | 80.471                            | 86.741                            | 65.649                             |
| <b>Average</b>         | <b>63.016</b> | <b>340.933</b>                | <b>68.750</b>                     | <b>66.968</b>                     | <b>65.865</b>                      |
| <b>SD</b>              | 36.847        | 44.679                        | 21.337                            | 15.753                            | 19.392                             |
|                        |               |                               |                                   |                                   |                                    |
| <b>B</b>               | <b>Con</b>    | <b>IL-1<math>\beta</math></b> | <b>Ace-IL-1<math>\beta</math></b> | <b>Pro-IL-1<math>\beta</math></b> | <b>Buty-IL-1<math>\beta</math></b> |
| <b>MIP2</b>            | 31.001        | 349.426                       | 68.460                            | 79.776                            | 80.605                             |
| <b>(pg/mg protein)</b> | 29.272        | 304.590                       | 70.904                            | 78.532                            | 77.645                             |
|                        | 32.411        | 281.947                       | 68.277                            | 74.888                            | 66.943                             |
|                        | 27.835        | 272.426                       | 64.093                            | 62.249                            | 47.281                             |
|                        | 31.772        | 255.415                       | 67.033                            | 85.176                            | 47.761                             |
|                        | 19.533        | 274.758                       | 65.687                            | 60.516                            | 48.153                             |
| <b>Average</b>         | <b>28.637</b> | <b>289.760</b>                | <b>67.409</b>                     | <b>73.523</b>                     | <b>61.398</b>                      |
| <b>SD</b>              | 4.766         | 33.305                        | 2.374                             | 9.981                             | 15.648                             |

**Fig 4. SCFAs inhibit IL-1 $\beta$  induced histone deacetylases 3 (HDAC3) and HDAC5 mRNA expression in immature enterocytes.**

| <b>A</b>                     | <b>Con</b>   | <b>Ace</b>   | <b>Pro</b>   | <b>Buty</b>  | <b>IL-1<math>\beta</math></b> | <b>Ace-IL-1<math>\beta</math></b> | <b>Pro-IL-1<math>\beta</math></b> | <b>Buty-IL-1<math>\beta</math></b> |
|------------------------------|--------------|--------------|--------------|--------------|-------------------------------|-----------------------------------|-----------------------------------|------------------------------------|
| <b>H4-HDAC3 mRNA fold</b>    | 0.992        | 0.757        | 1.924        | 1.940        | 8.360                         | 3.001                             | 3.079                             | 0.748                              |
| <b>(Normalized to GAPDH)</b> | 0.906        | 1.342        | 2.107        | 1.562        | 11.349                        | 3.970                             | 4.423                             | 0.872                              |
|                              | 1.112        | 1.137        | 1.801        | 1.661        | 9.457                         | 3.034                             | 3.535                             | 1.035                              |
| <b>Average</b>               | <b>1.004</b> | <b>1.079</b> | <b>1.944</b> | <b>1.721</b> | <b>9.722</b>                  | <b>3.335</b>                      | <b>3.679</b>                      | <b>0.885</b>                       |
| <b>SD</b>                    | 0.103        | 0.297        | 0.154        | 0.196        | 1.512                         | 0.550                             | 0.683                             | 0.144                              |
|                              |              |              |              |              |                               |                                   |                                   |                                    |
| <b>B</b>                     | <b>Con</b>   | <b>Ace</b>   | <b>Pro</b>   | <b>Buty</b>  | <b>IL-1<math>\beta</math></b> | <b>Ace-IL-1<math>\beta</math></b> | <b>Pro-IL-1<math>\beta</math></b> | <b>Buty-IL-1<math>\beta</math></b> |
| <b>H4-HDAC5 mRNA fold</b>    | 1.004        | 1.398        | 1.662        | 1.897        | 10.986                        | 0.462                             | 0.742                             | 0.443                              |
| <b>(Normalized to GAPDH)</b> | 0.919        | 1.867        | 1.651        | 1.310        | 12.553                        | 0.480                             | 0.747                             | 0.654                              |
|                              | 1.083        | 1.666        | 1.544        | 1.058        | 12.466                        | 0.349                             | 0.929                             | 0.471                              |
| <b>Average</b>               | <b>1.002</b> | <b>1.644</b> | <b>1.619</b> | <b>1.422</b> | <b>12.002</b>                 | <b>0.430</b>                      | <b>0.806</b>                      | <b>0.523</b>                       |
| <b>SD</b>                    | 0.082        | 0.236        | 0.065        | 0.430        | 0.881                         | 0.071                             | 0.107                             | 0.114                              |

**Fig 5. SCFAs inhibit IL-1 $\beta$  induced HDACs protein expression in immature enterocytes.**

| HDACs Protein<br>(Luminescent intensity ) | Con           | Ace           | Pro           | Buty          | IL-1 $\beta$   | Ace-IL-1 $\beta$ | Pro-IL-1 $\beta$ | Buty-IL-1 $\beta$ |
|-------------------------------------------|---------------|---------------|---------------|---------------|----------------|------------------|------------------|-------------------|
|                                           | 7416.0        | 7647.0        | 3633.0        | 3241.0        | 19115.0        | 3852.0           | 2469.0           | 3241.0            |
|                                           | 6771.0        | 8255.0        | 4877.0        | 3063.0        | 20670.0        | 3707.0           | 2997.0           | 3063.0            |
|                                           | 7594.0        | 6207.0        | 4013.0        | 2997.0        | 16651.0        | 4334.0           | 1189.0           | 4013.0            |
| <b>Average</b>                            | <b>7260.3</b> | <b>7369.7</b> | <b>4174.3</b> | <b>3100.3</b> | <b>18812.0</b> | <b>3964.3</b>    | <b>2218.3</b>    | <b>3439.0</b>     |
| SD                                        | 433.0         | 1051.8        | 637.5         | 126.2         | 2026.6         | 328.2            | 929.7            | 505.0             |

**Fig 6. Both HDAC3 and HDAC5 are required for mediating IL-1 $\beta$  induced IL-8 secretion in immature enterocytes *in vitro* and *ex vivo***

| A                    | Con           | IL-1 $\beta$    | TSA-IL-1 $\beta$ | LMK-IL-1 $\beta$ |
|----------------------|---------------|-----------------|------------------|------------------|
| IL8(pg/mg protein)   | 68.618        | 1453.376        | 825.419          | 919.872          |
|                      | 69.027        | 1211.505        | 802.803          | 866.237          |
|                      | 74.170        | 1475.066        | 766.930          | 545.120          |
| <b>Average</b>       | <b>70.605</b> | <b>1379.982</b> | <b>798.384</b>   | <b>777.076</b>   |
| SD                   | 3.094         | 146.308         | 29.494           | 202.662          |
|                      |               |                 |                  |                  |
| B                    | Con           | IL-1 $\beta$    | TSA-IL-1 $\beta$ | LMK-IL-1 $\beta$ |
| MIP2 (pg/mg protein) | 46.896        | 160.702         | 88.374           | 35.974           |
|                      | 37.205        | 164.465         | 71.539           | 33.517           |
|                      | 29.076        | 160.975         | 58.002           | 34.400           |
|                      | 51.375        | 151.262         | 92.871           | 53.418           |
|                      | 63.766        | 147.962         | 55.967           | 52.571           |
|                      | 29.076        | 156.541         | 60.842           | 57.285           |
| <b>Average</b>       | <b>42.899</b> | <b>156.984</b>  | <b>71.266</b>    | <b>44.528</b>    |
| SD                   | 12.502        | 5.774           | 14.596           | 10.029           |
|                      |               |                 |                  |                  |
| C                    | Con           | IL-1 $\beta$    | TSA-IL-1 $\beta$ | LMK-IL-1 $\beta$ |
| MIP2 (pg/mg protein) | 31.001        | 349.426         | 61.155           | 69.647           |
|                      | 29.272        | 304.590         | 50.734           | 70.888           |
|                      | 32.411        | 272.896         | 50.949           | 68.390           |
|                      | 35.023        | 281.946         | 67.238           | 69.647           |
|                      | 45.206        | 264.577         | 66.912           | 70.888           |
|                      | 44.090        | 222.465         | 75.584           | 68.390           |
| <b>Average</b>       | <b>36.167</b> | <b>282.650</b>  | <b>62.095</b>    | <b>69.642</b>    |
| SD                   | 6.843         | 42.391          | 9.857            | 1.117            |

**Fig 7. SCFAs increase G protein-coupled receptors 109A (GPR109A) mRNA expression in response to IL-1 $\beta$  stimulation in human immature enterocytes**

|                       | Con         | Ace         | Pro         | Buty        | IL-1 $\beta$ | Ace-IL-1 $\beta$ | Pro-IL-1 $\beta$ | Buty-IL-1 $\beta$ |
|-----------------------|-------------|-------------|-------------|-------------|--------------|------------------|------------------|-------------------|
| <b>109A mRNA fold</b> | 1.16        | 2.88        | 2.94        | 4.16        | 2.39         | 16.46            | 10.97            | 10.01             |
| (Normalized to GAPDH) | 0.86        | 3.28        | 4.06        | 4.92        | 1.89         | 19.90            | 15.47            | 14.65             |
|                       | 1.00        | 3.14        | 4.54        | 4.29        | 2.31         | 22.15            | 10.86            | 15.75             |
| <b>Average</b>        | <b>1.01</b> | <b>3.10</b> | <b>3.85</b> | <b>4.46</b> | <b>2.20</b>  | <b>19.50</b>     | <b>12.43</b>     | <b>13.47</b>      |
| SD                    | 0.152       | 0.202       | 0.821       | 0.409       | 0.267        | 2.866            | 2.631            | 3.047             |

**Fig 8. 109A is required for SCFAs anti IL-1 $\beta$  induced IL8 induction in H4 cells**

|                  | Con           | IL-1 $\beta$    | 0.2mM MB<br>Ace-IL-1 $\beta$ | 0.2mM MB<br>Pro-IL-1 $\beta$ | 0.2mM MB<br>Buty -IL-1 $\beta$ | Ace-IL-1 $\beta$ | Pro-IL-1 $\beta$ | Buty-IL-1 $\beta$ |
|------------------|---------------|-----------------|------------------------------|------------------------------|--------------------------------|------------------|------------------|-------------------|
| <b>IL8</b>       |               |                 |                              |                              |                                |                  |                  |                   |
| (pg/ mg protein) | 18.959        | 919.264         | 864.756                      | 873.847                      | 1440.781                       | 585.205          | 396.026          | 547.326           |
|                  | 14.809        | 1371.54         | 904.844                      | 945.696                      | 916.526                        | 642.623          | 459.94           | 684.226           |
|                  | 12.869        | 871.819         | 885.766                      | 994.976                      | 1324.138                       | 627.615          | 336.368          | 426.11            |
| <b>Average</b>   | <b>15.546</b> | <b>1054.208</b> | <b>885.122</b>               | <b>938.173</b>               | <b>1227.148</b>                | <b>618.481</b>   | <b>397.445</b>   | <b>552.554</b>    |
| SD               | 3.111         | 275.840         | 20.052                       | 60.914                       | 275.256                        | 29.779           | 61.798           | 129.137           |

## Supporting information

**S1 Fig. SCFAs inhibited IL-1 $\beta$  induced IL8 induction in Caco2 cells but not by inhibition of HDACs activity**

| <b>A</b>                              | <b>Con</b> | <b>IL-1<math>\beta</math></b> | <b>Ace-IL-1<math>\beta</math></b> | <b>Pro-IL-1<math>\beta</math></b> | <b>Buty-IL-1<math>\beta</math></b> |
|---------------------------------------|------------|-------------------------------|-----------------------------------|-----------------------------------|------------------------------------|
| <b>IL8(pg/mg protein)<br/>(Caco2)</b> | 23.521     | 483.126                       | 97.785                            | 70.813                            | 64.532                             |
|                                       | 31.709     | 456.819                       | 70.778                            | 80.659                            | 69.341                             |
|                                       | 28.072     | 449.254                       | 57.274                            | 60.260                            | 61.358                             |
| <b>Average</b>                        | 27.767     | 463.067                       | 75.279                            | 70.577                            | 65.077                             |
| <b>SD</b>                             | 4.102      | 17.779                        | 20.627                            | 10.201                            | 4.019                              |
|                                       |            |                               |                                   |                                   |                                    |
| <b>B</b>                              | <b>Con</b> | <b>IL-1<math>\beta</math></b> | <b>Ace-IL-1<math>\beta</math></b> | <b>Pro-IL-1<math>\beta</math></b> | <b>Buty-IL-1<math>\beta</math></b> |
| <b>Caco2 -HDAC3 mRNA fold</b>         | 1.067      | 0.717                         | 1.008                             | 0.929                             | 1.138                              |
| (Normalized to GAPDH)                 | 0.744      | 1.021                         | 0.857                             | 0.598                             | 1.411                              |
|                                       | 0.794      | 0.831                         | 1.095                             | 0.802                             | 1.440                              |
| <b>Average</b>                        | 0.868      | 0.856                         | 0.987                             | 0.777                             | 1.330                              |
| <b>SD</b>                             | 0.174      | 0.153                         | 0.120                             | 0.167                             | 0.166                              |
|                                       |            |                               |                                   |                                   |                                    |
| <b>C</b>                              | <b>Con</b> | <b>IL-1<math>\beta</math></b> | <b>Ace-IL-1<math>\beta</math></b> | <b>Pro-IL-1<math>\beta</math></b> | <b>Buty-IL-1<math>\beta</math></b> |
| <b>Caco2-HDAC5 mRNA fold</b>          | 1.029      | 0.626                         | 0.668                             | 0.996                             | 0.890                              |
| (Normalized to GAPDH)                 | 0.870      | 0.601                         | 0.815                             | 0.646                             | 0.984                              |
|                                       | 1.117      | 0.944                         | 0.878                             | 0.762                             | 1.325                              |
| <b>Average</b>                        | 1.005      | 0.724                         | 0.787                             | 0.801                             | 1.066                              |
| <b>SD</b>                             | 0.125      | 0.191                         | 0.108                             | 0.178                             | 0.229                              |
